# Supplementary material for: Integrin αvβ3 Is a Master Regulator of Resistance to TKI-Induced Ferroptosis in HER2-Positive Breast Cancer
Source: MDPI journal article supplement (doi:10.3390/cancers15041216), 2023-02-14

**Nagpal et al 2023 Supplementary Material- Uncropped Western Blot  
Compilation**

**Figure 2B**

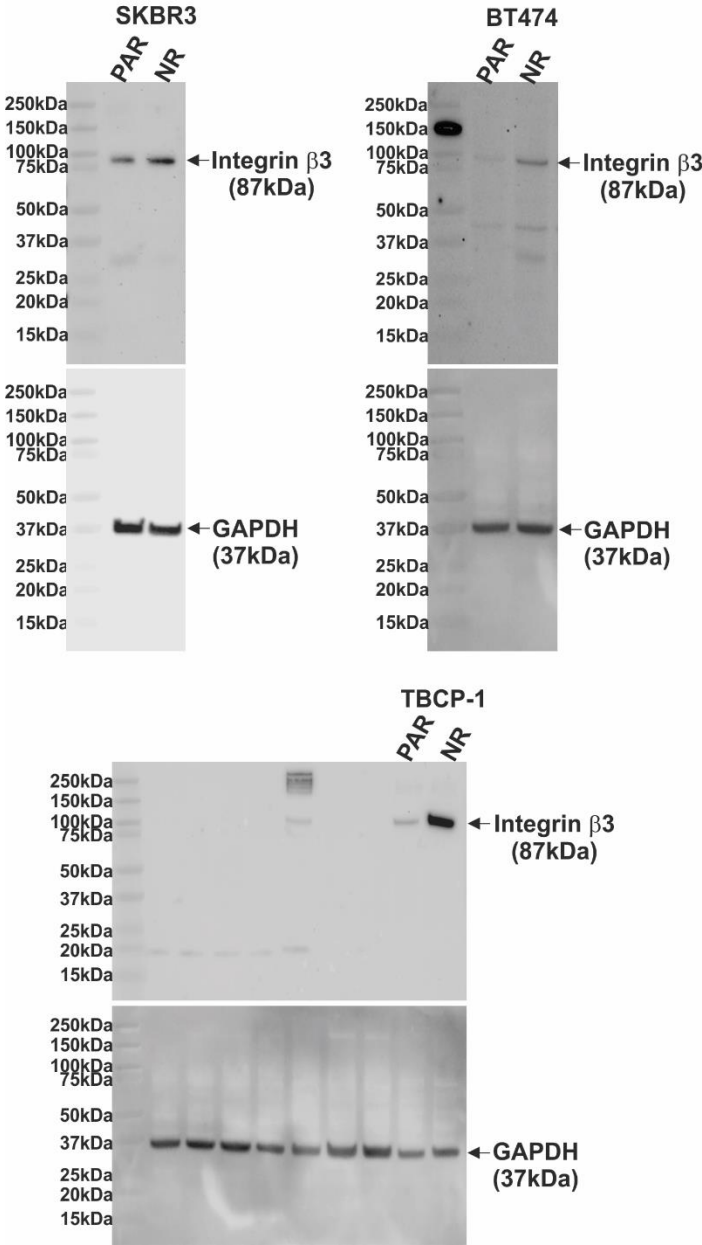

**Figure 2D**

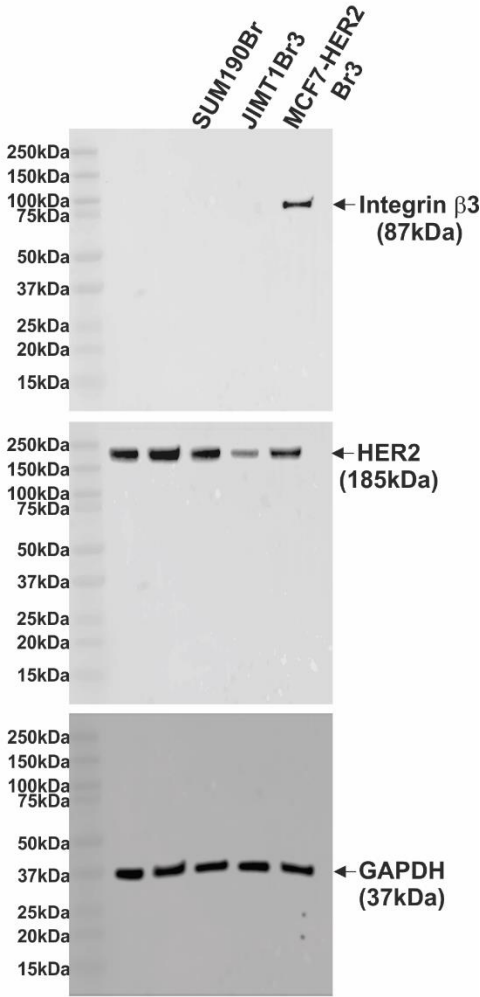

**Figure 3A**

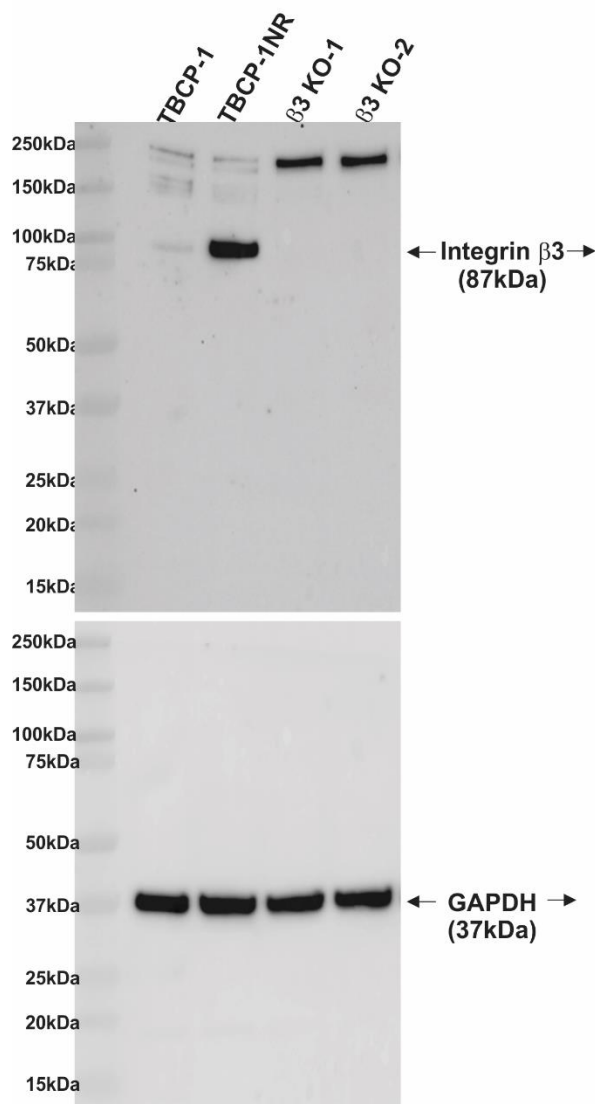

**Figure 3B**

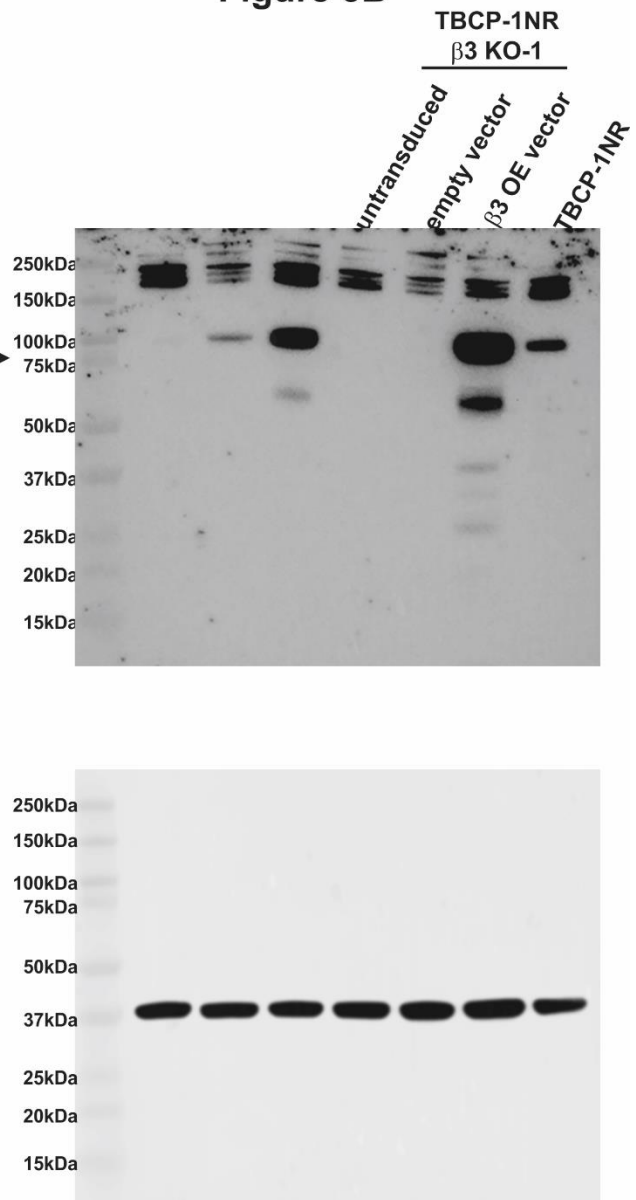

**Figure 4A**

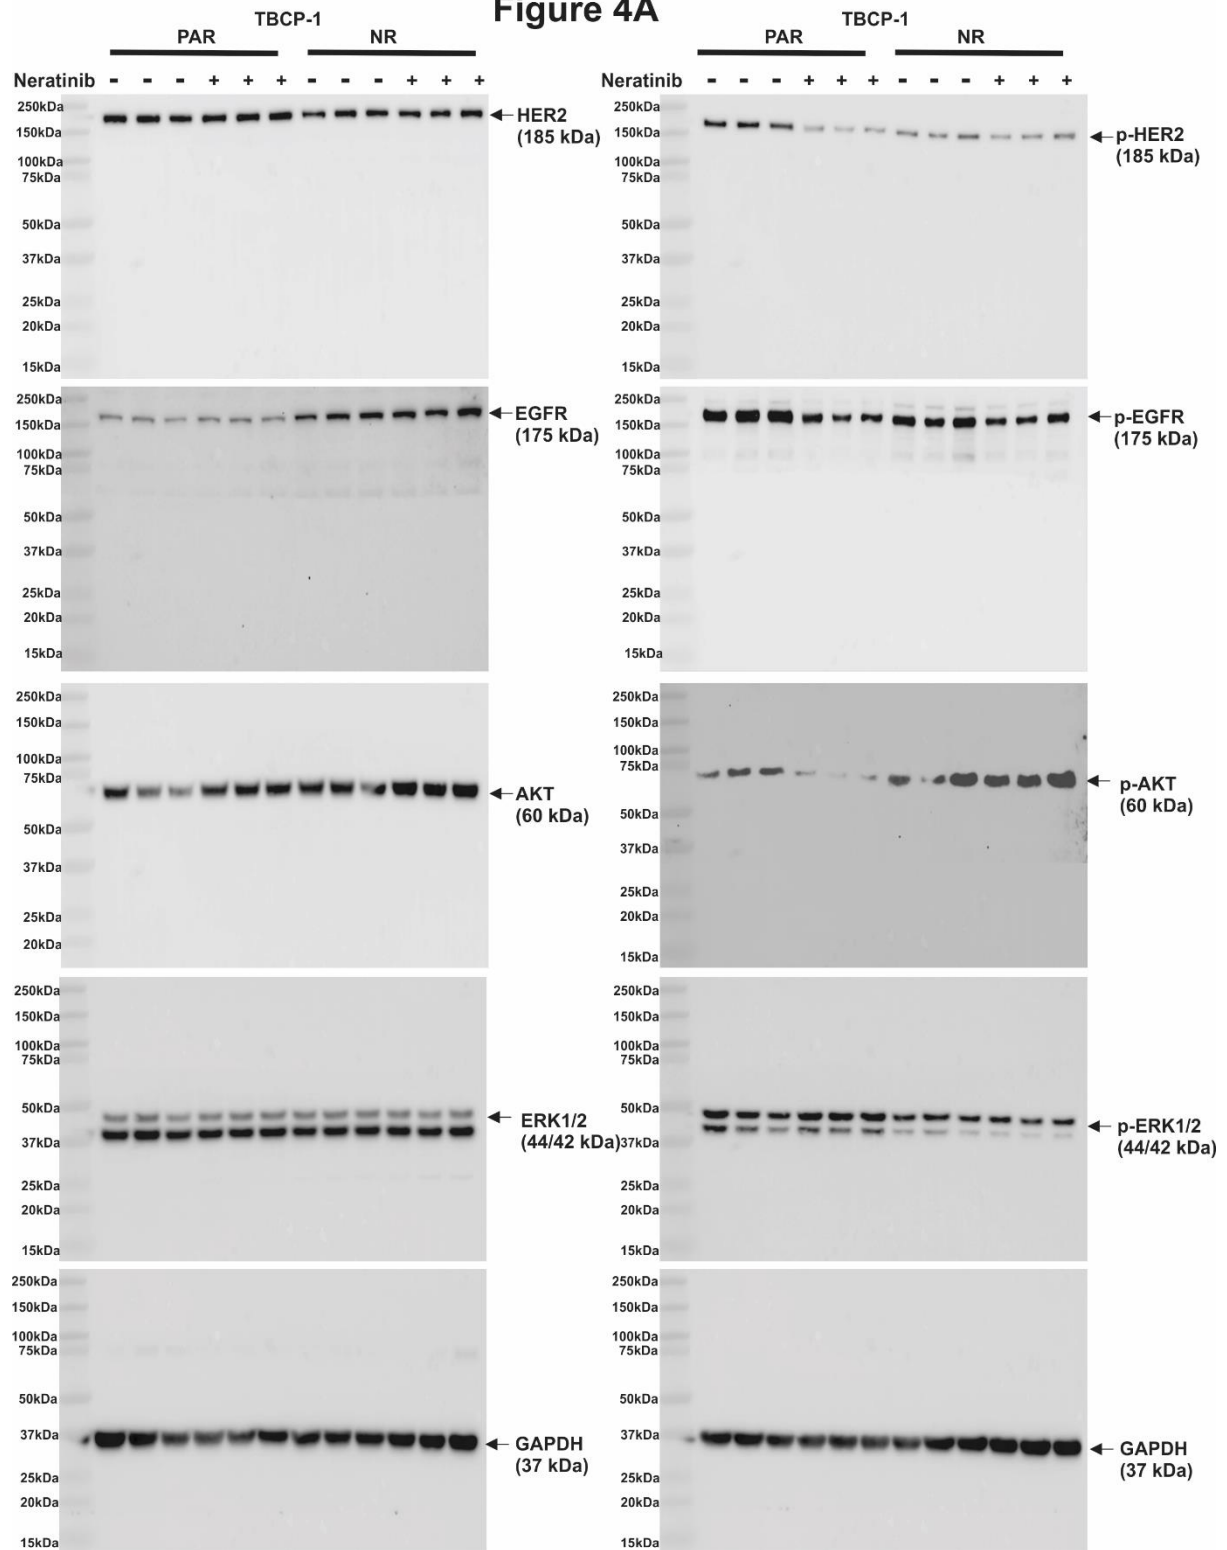

**Figure 4C**

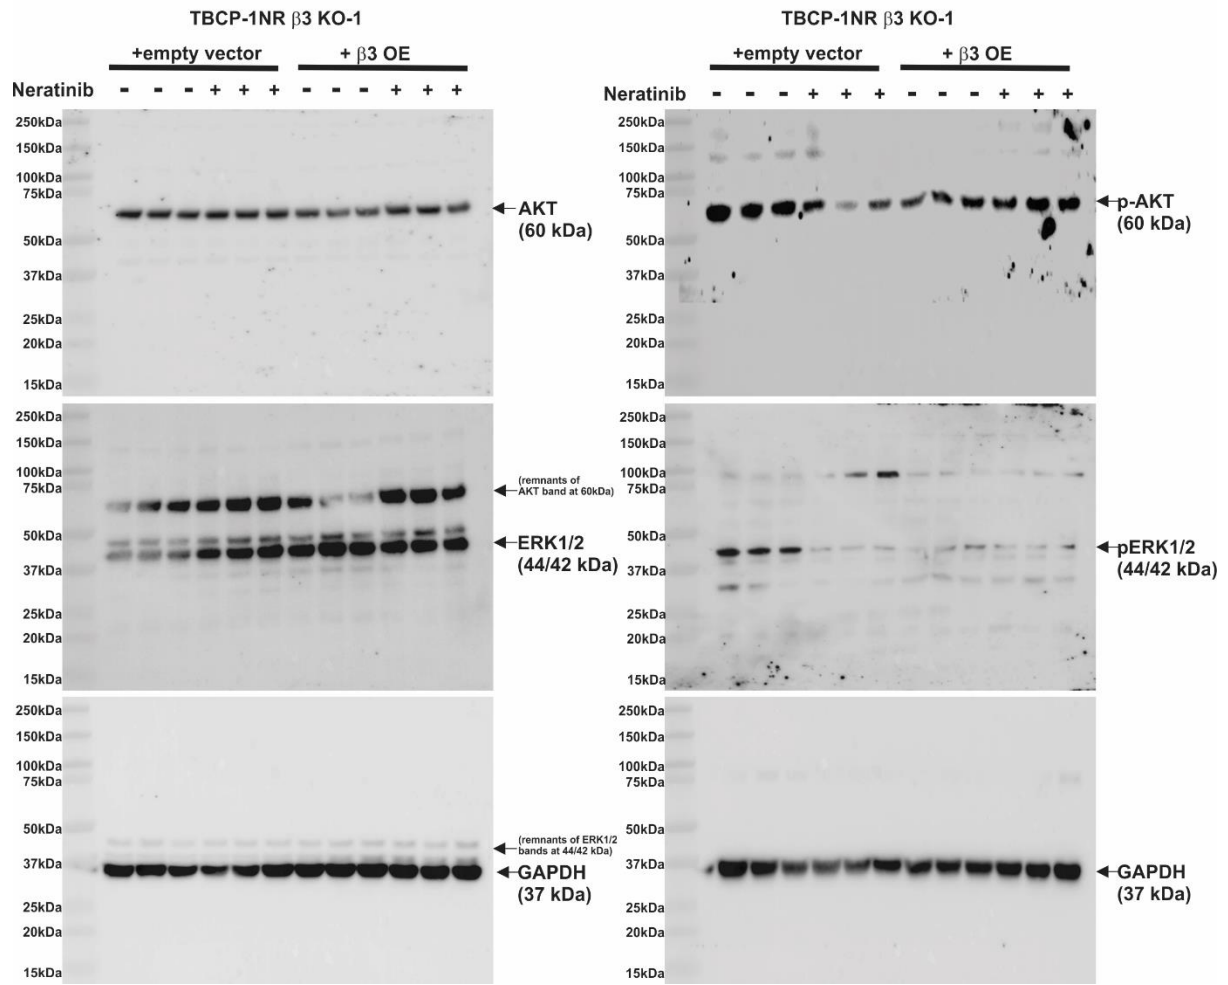

**Figure 4E**

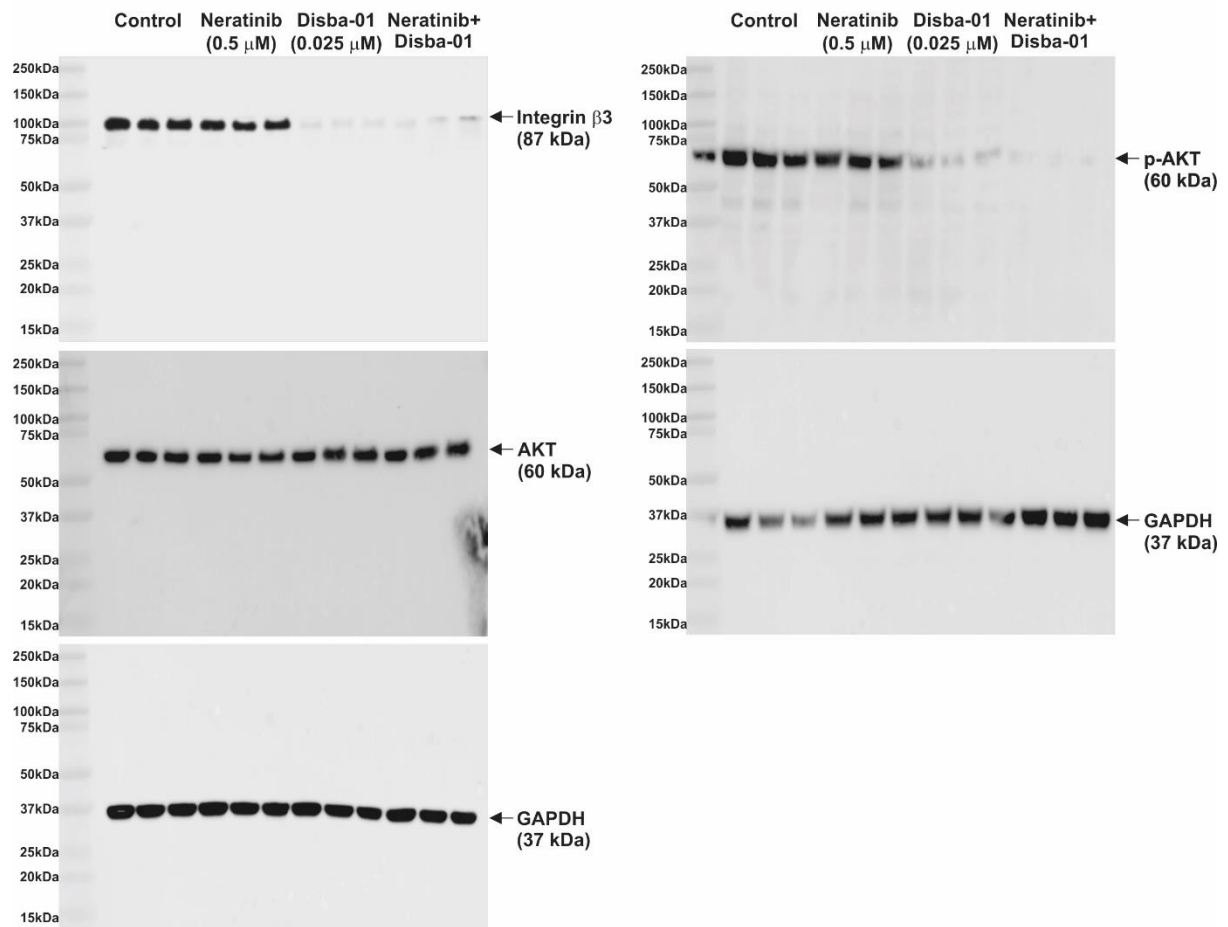

**Figure 5A**

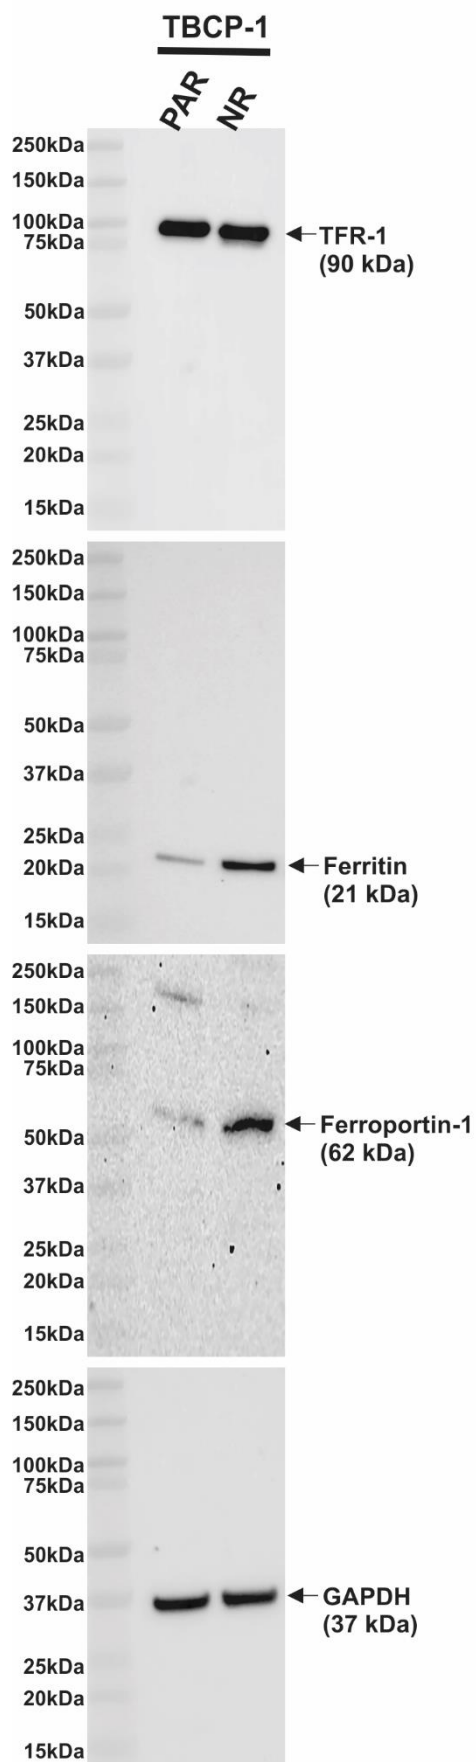

**Figure 5B**

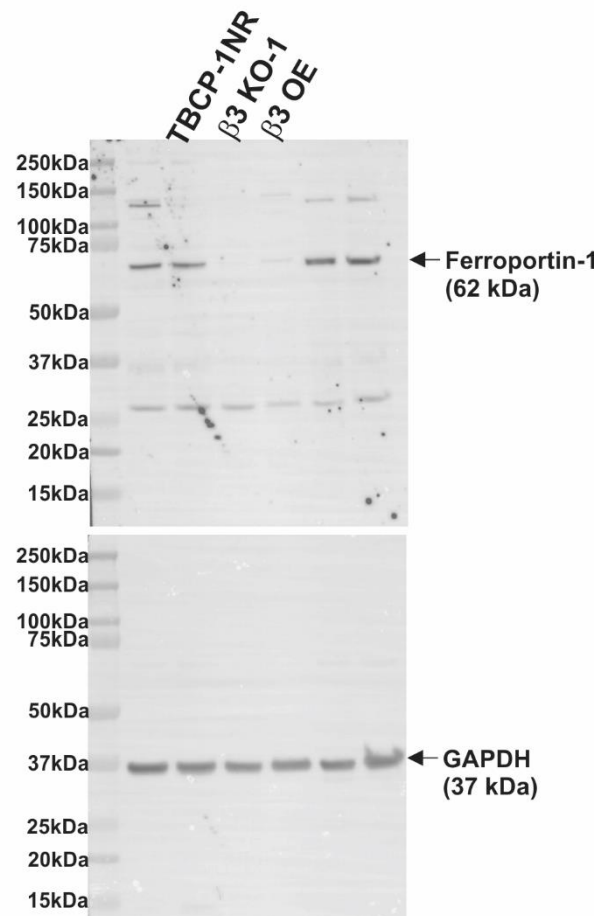

## Supplementary Figure 3

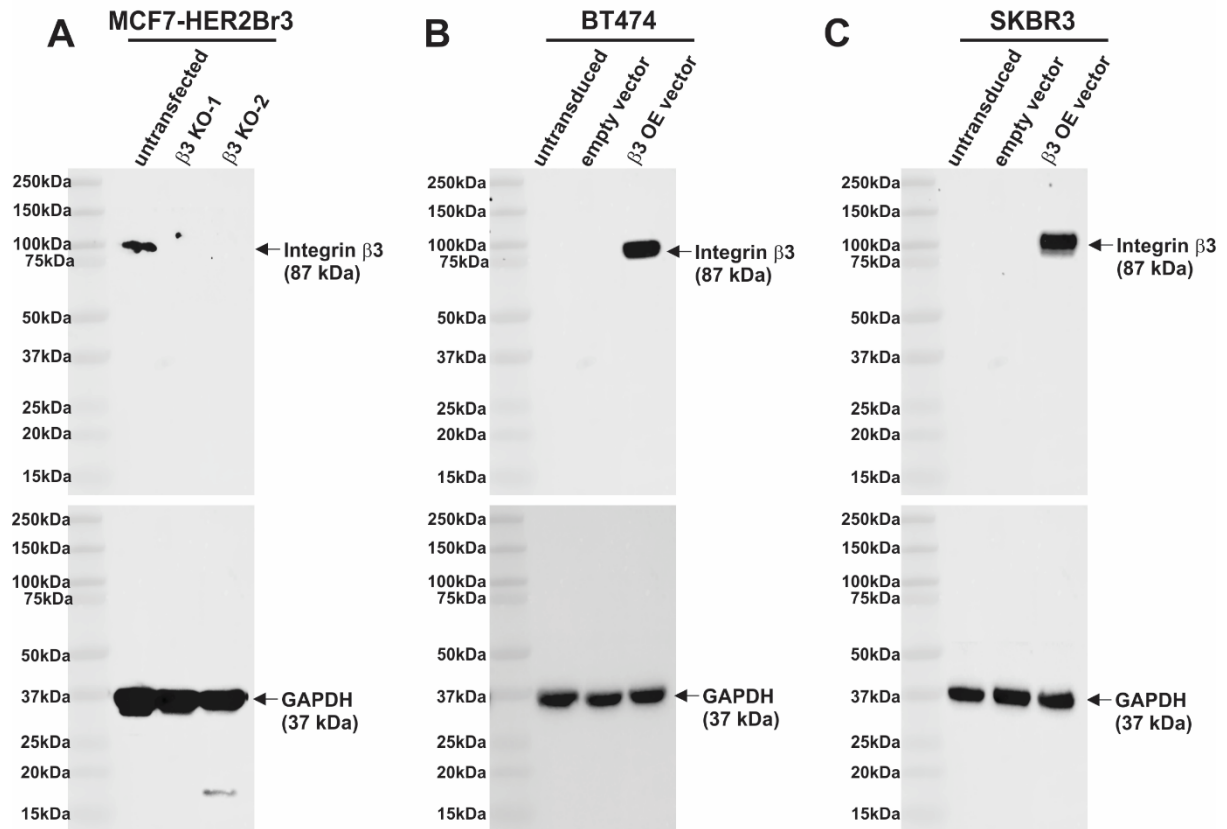

## Supplementary Figure 5A

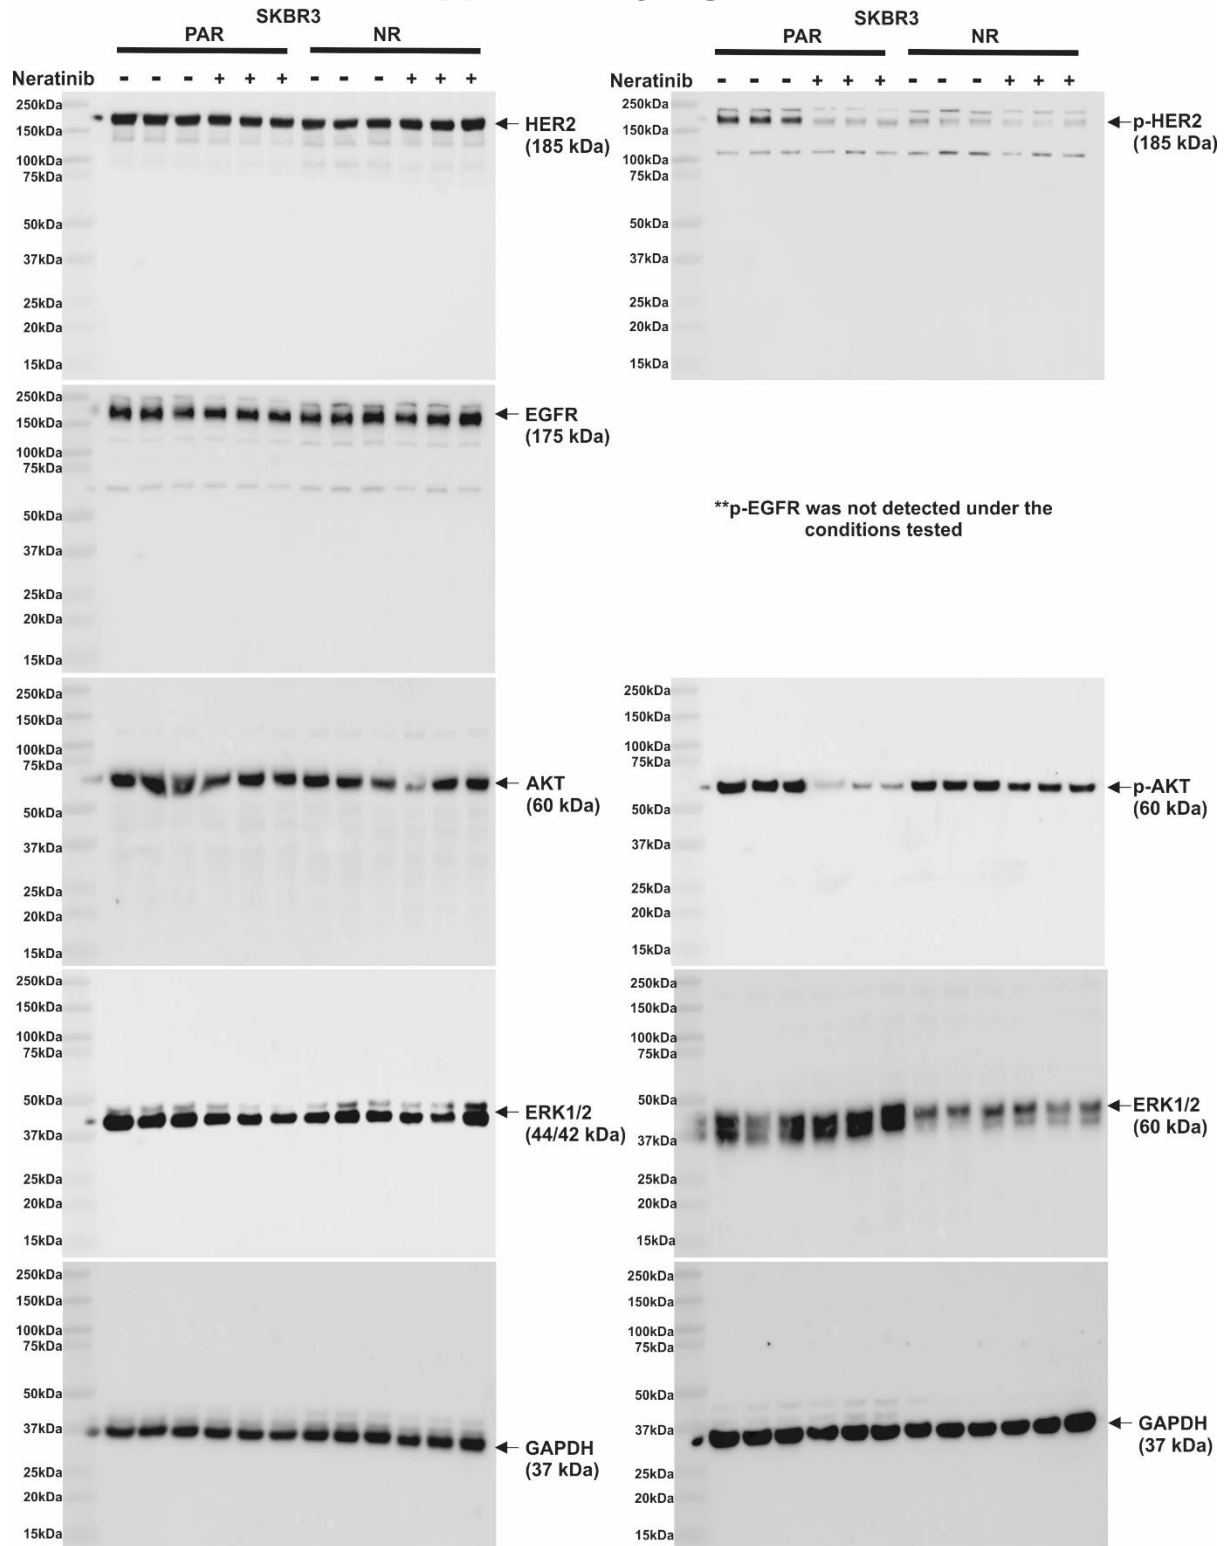



Supplementary Figure 5C

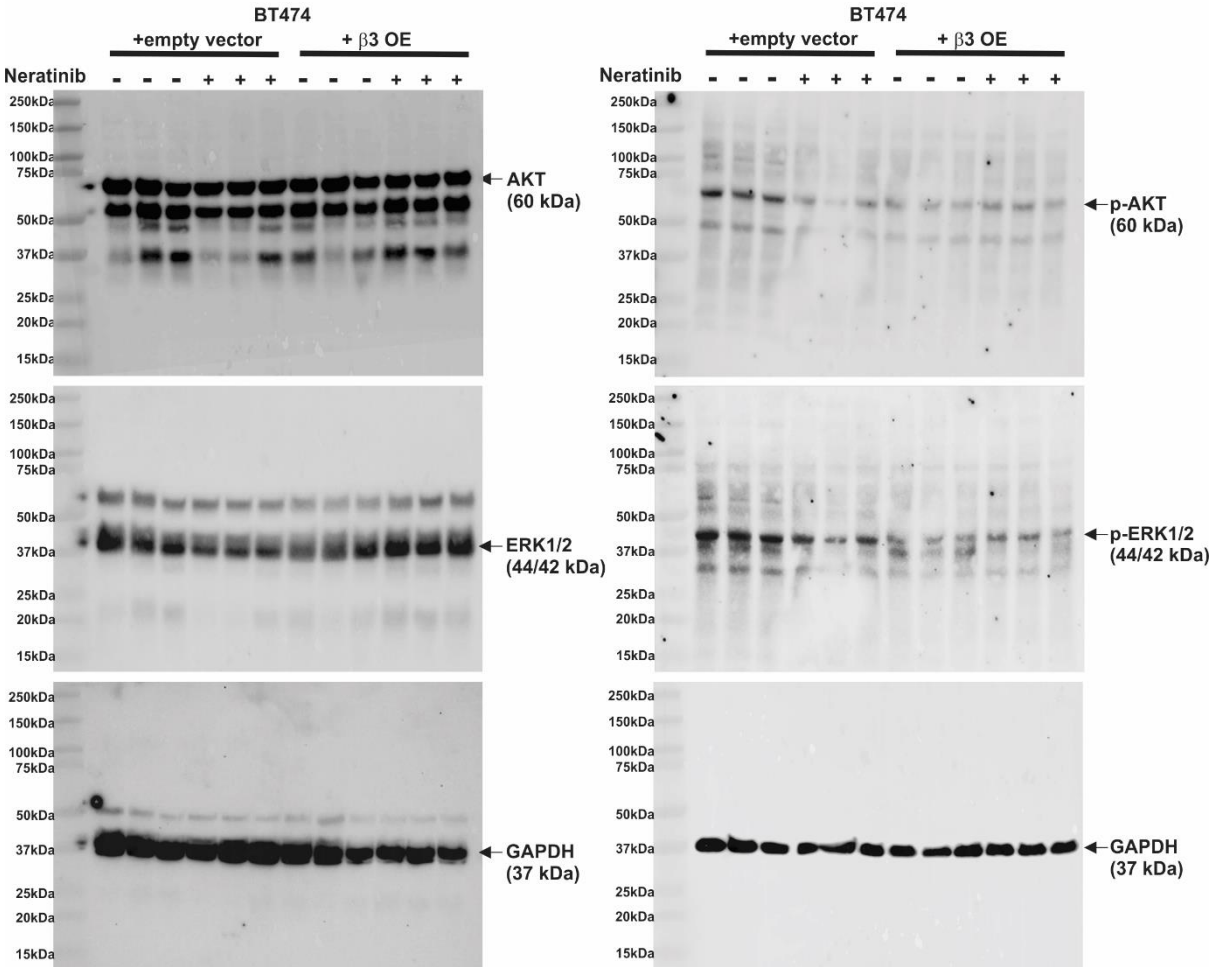

Supplementary Figure 6

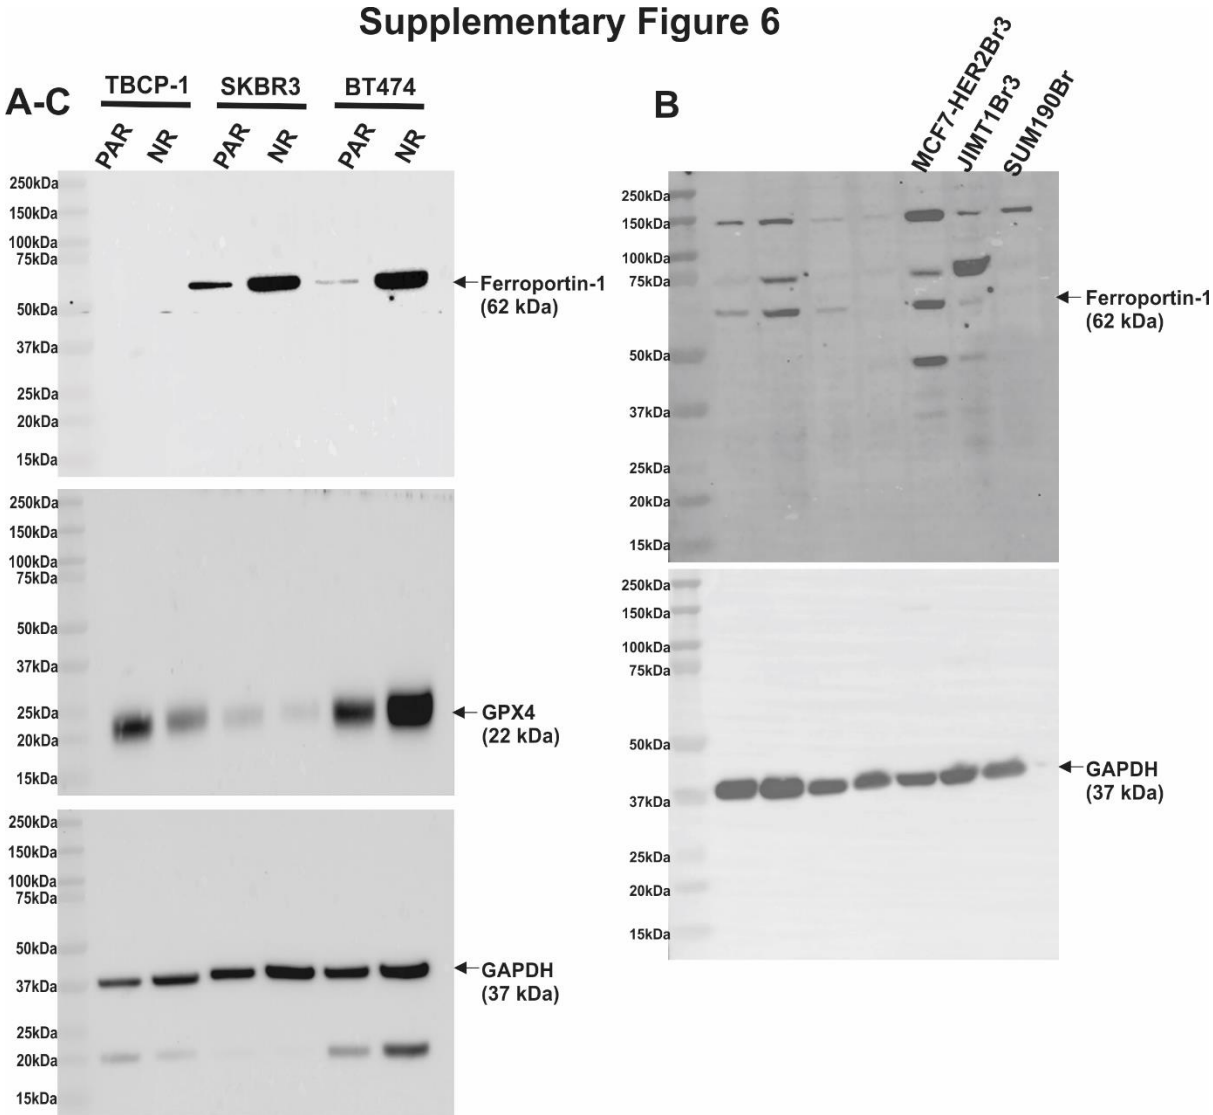

## Supplementary Figure 7

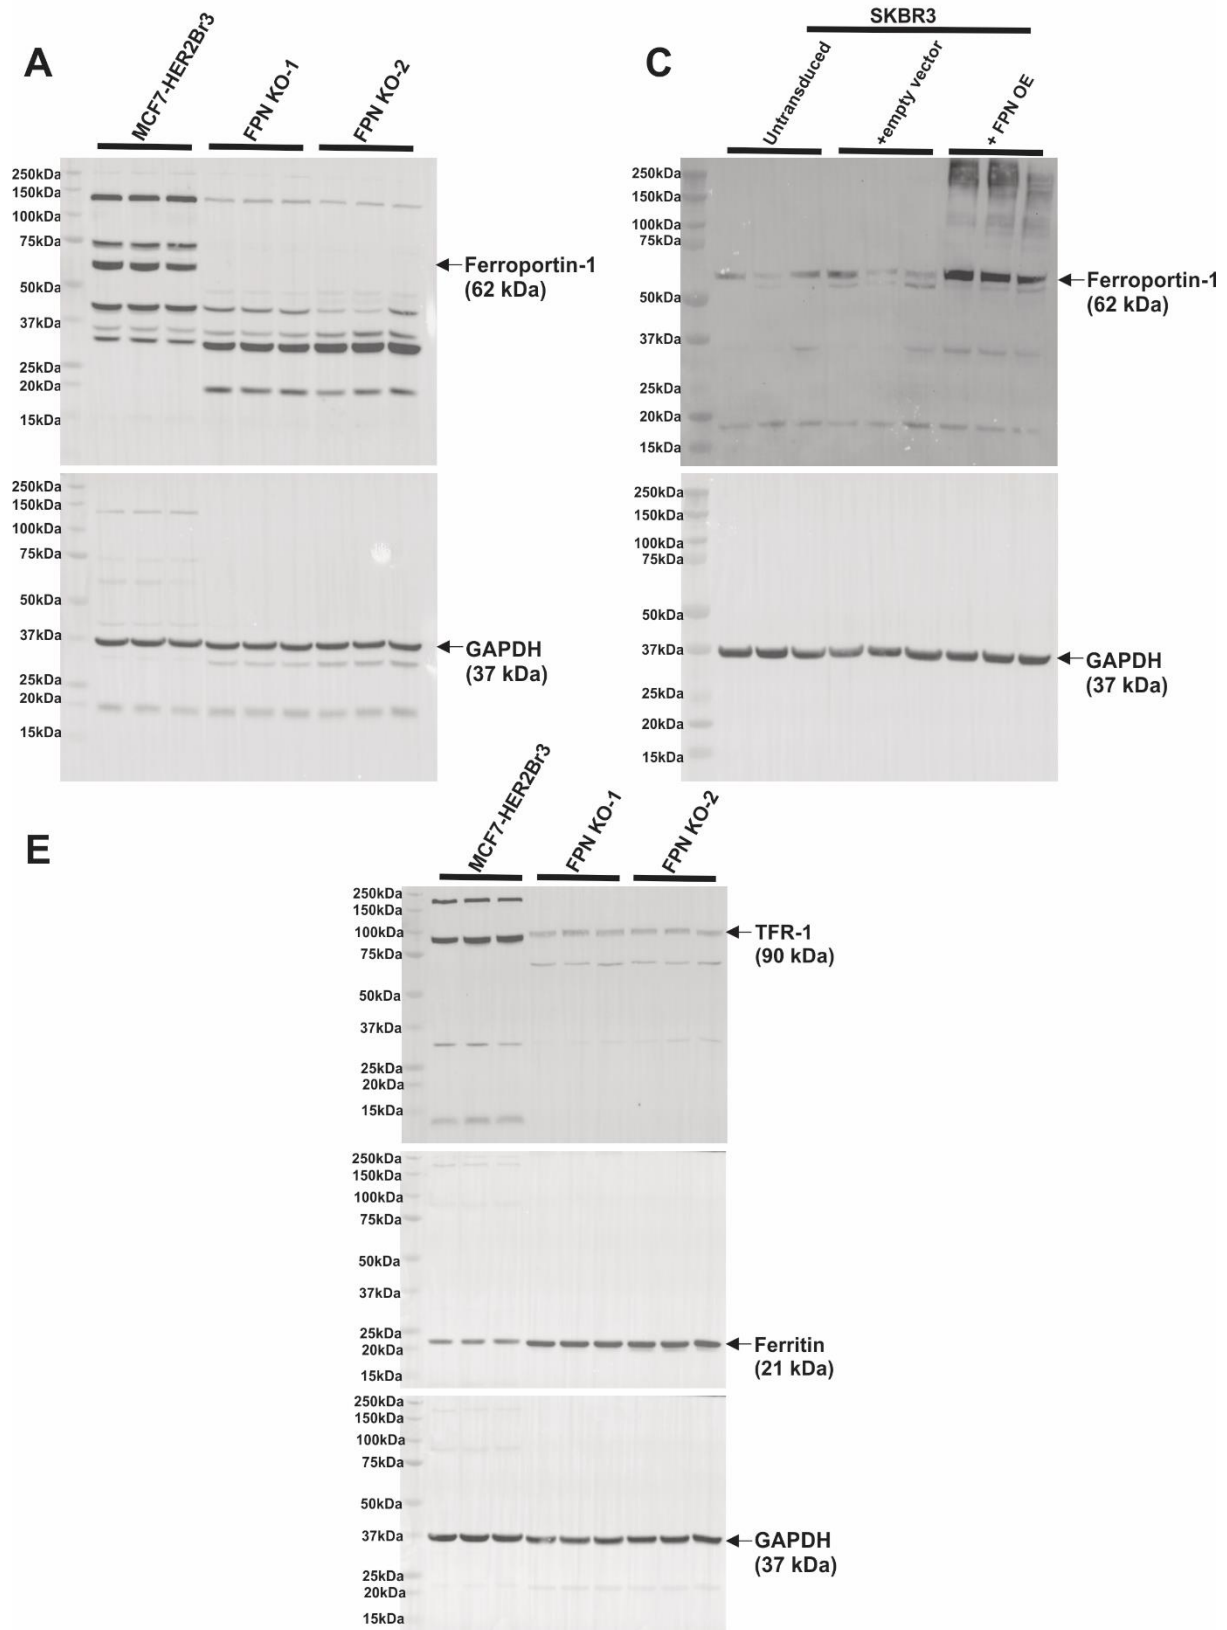

Supplement: s1 [file s1]
